# Supplementary material for: Age-Dependent Transition from Cell-Level to Population-Level Control in Murine Intestinal Homeostasis Revealed by Coalescence Analysis
Source: PLOS journal article supplement (doi:10.1371/journal.pgen.1003326), 2013-02-28

**difference in asymmetric division rate  
over 100 bootstrap samples**

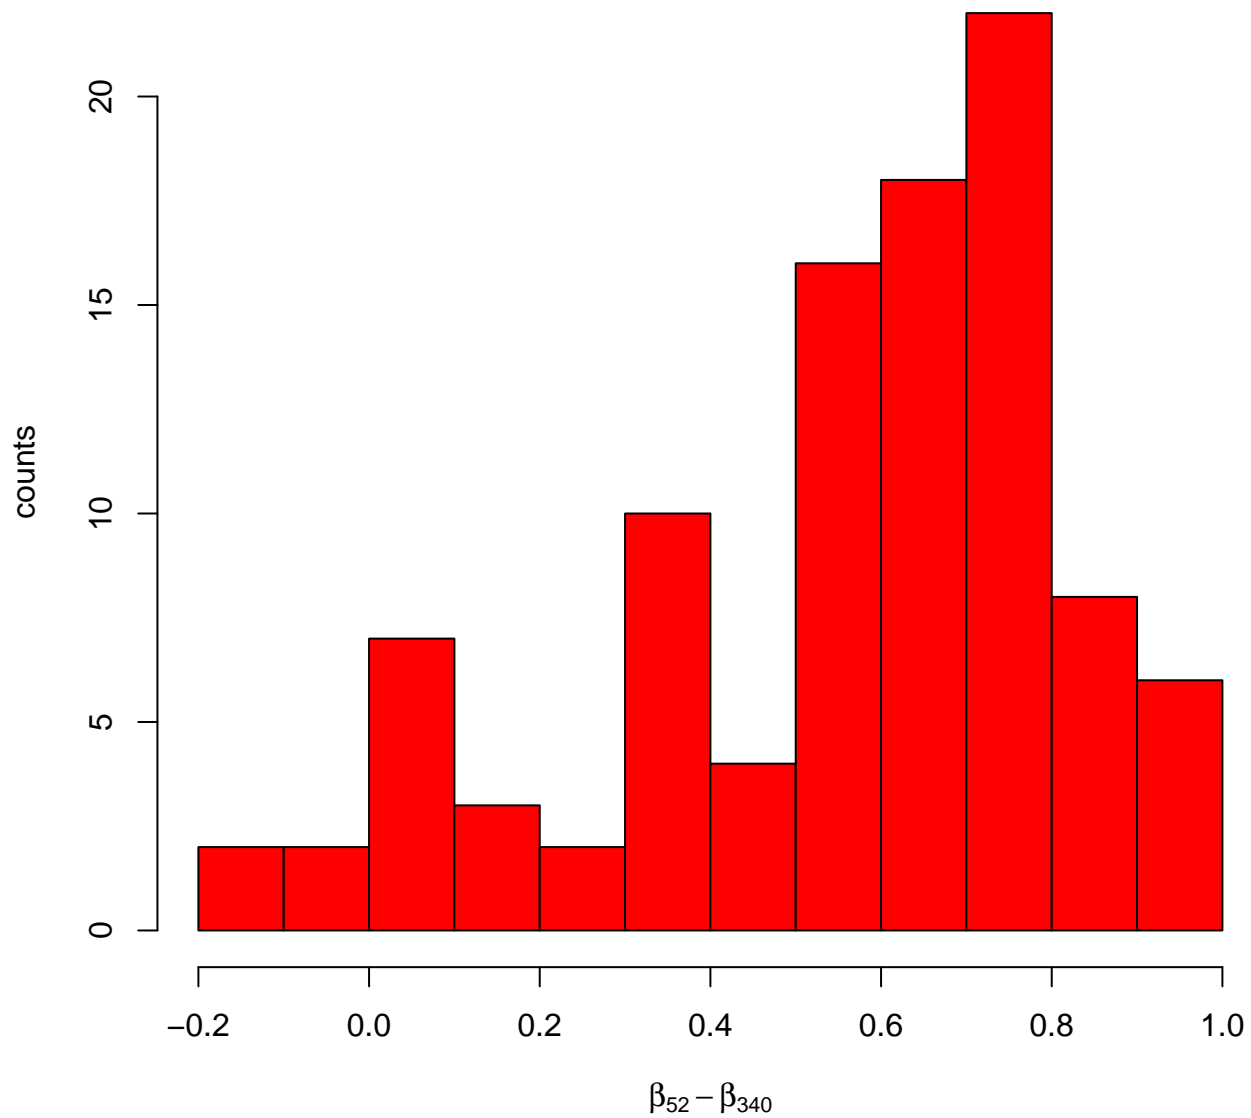

Supplement: S1 (10.1371/journal.pgen.1003326.s001) [file journal.pgen.1003326.s001.pdf › journal.pgen.1003326.s001.pdf]
