# Supplementary material for: Age-Dependent Transition from Cell-Level to Population-Level Control in Murine Intestinal Homeostasis Revealed by Coalescence Analysis
Source: PLOS journal article supplement (doi:10.1371/journal.pgen.1003326), 2013-02-28

**A. Likelihood for the first crypt at day 52**

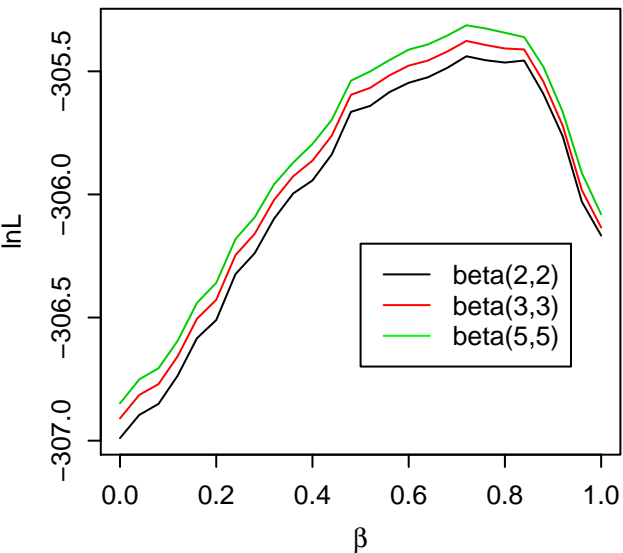

**B. Likelihood for the second crypt at day 52**

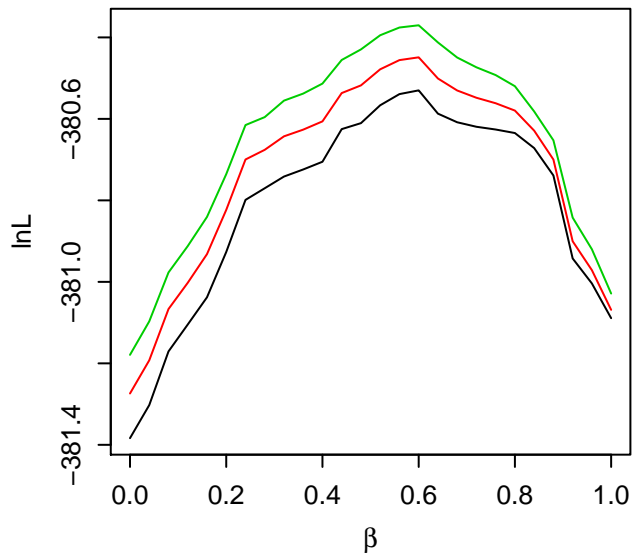

**C. Likelihood for the first crypt at day 340**

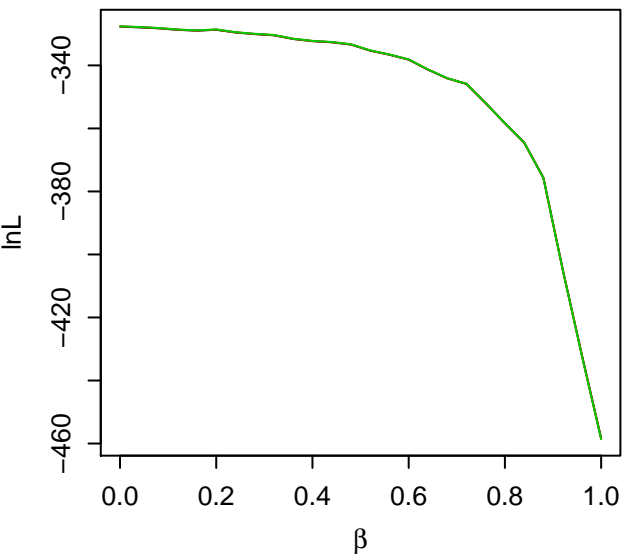

**D. Likelihood for the second crypt at day 340**

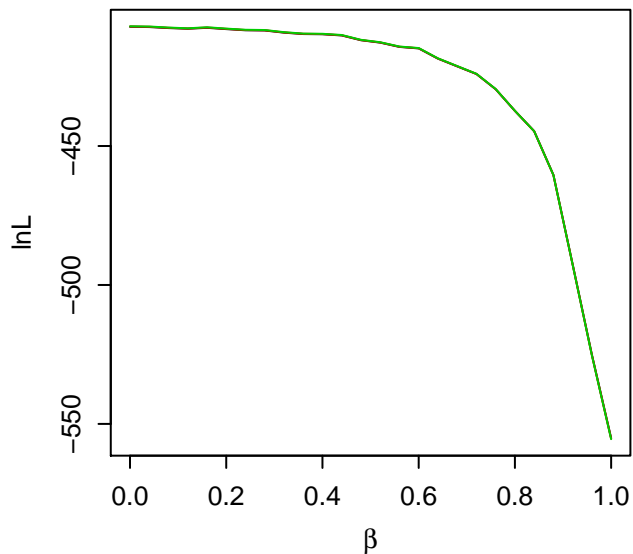

Supplement: S3 (10.1371/journal.pgen.1003326.s003) [file journal.pgen.1003326.s003.pdf › journal.pgen.1003326.s003.pdf]
